# Supplementary material for: Infective endocarditis: Do we have an effective risk score model? A systematic review
Source: Frontiers journal article supplement (doi:10.3389/fcvm.2023.1093363), 2023-02-20
Supplement: Table_2.pdf [file Table_2.pdf]

Supplementary Table 2: Prediction model Risk Of Bias Assessment Tool (PROBAST)

| STUDY                                                                                                                                                                                                         | SCORE                       | STUDY TYPE                 | Risk of Bias (ROB)                                                                                                                                                                                                                                                                                                                                                      |            |         |          | Applicability |            |         | Overall |               |
|---------------------------------------------------------------------------------------------------------------------------------------------------------------------------------------------------------------|-----------------------------|----------------------------|-------------------------------------------------------------------------------------------------------------------------------------------------------------------------------------------------------------------------------------------------------------------------------------------------------------------------------------------------------------------------|------------|---------|----------|---------------|------------|---------|---------|---------------|
|                                                                                                                                                                                                               |                             |                            | Participants                                                                                                                                                                                                                                                                                                                                                            | Predictors | Outcome | Analysis | Participants  | Predictors | Outcome | ROB     | Applicability |
| Martinez-Sellis M, Muñoz P et al. <sup>9</sup>                                                                                                                                                                | PALSUSE                     | Development only           | -                                                                                                                                                                                                                                                                                                                                                                       | +          | +       | -        | ?             | +          | +       | -       | +             |
|                                                                                                                                                                                                               |                             |                            | Participants undergoing medical treatment and later those with implantable devices excluded; Use of univariate analysis, Exclusion of subgroups of patients, No information RE handling of missing data, No internal validation                                                                                                                                         |            |         |          |               |            |         |         |               |
| De Feo M, Cotrufo M et al. <sup>10</sup>                                                                                                                                                                      | DE FEO                      | Development only           | -                                                                                                                                                                                                                                                                                                                                                                       | +          | +       | -        | ?             | +          | +       | -       | +             |
|                                                                                                                                                                                                               |                             |                            | Left sided native valve active surgically managed patients only, <20 events per variable (EPV) for development cohort (40 patients), No information RE handling of missing data, No internal validation                                                                                                                                                                 |            |         |          |               |            |         |         |               |
| Gatti G, Benussi B et al. <sup>11</sup>                                                                                                                                                                       | ANCLA                       | Development only           | -                                                                                                                                                                                                                                                                                                                                                                       | +          | +       | -        | ?             | +          | +       | -       | +             |
|                                                                                                                                                                                                               |                             |                            | Surgical patients only. <20 EPV for development cohort (28 patients), No information RE handling of missing data, No internal validation                                                                                                                                                                                                                                |            |         |          |               |            |         |         |               |
| Olmos C, Vilacosta I et al. <sup>12</sup>                                                                                                                                                                     | RISK-E                      | Development and validation | -                                                                                                                                                                                                                                                                                                                                                                       | ?          | +       | -        | ?             | +          | +       | -       | +             |
|                                                                                                                                                                                                               |                             |                            | Surgical patients with left-sided IE only. Duke criteria used up to 2002 and modified Duke criteria thereafter. Only 68 patients with the outcome in the validation sample – PROBAST recommends >100.                                                                                                                                                                   |            |         |          |               |            |         |         |               |
| Di Mauro M, Dato GMA et al. <sup>13</sup>                                                                                                                                                                     | EndoSCORE                   | Development only           | -                                                                                                                                                                                                                                                                                                                                                                       | +          | +       | +        | ?             | +          | +       | -       | +             |
|                                                                                                                                                                                                               |                             |                            | Surgical patients; No information RE handling of missing data                                                                                                                                                                                                                                                                                                           |            |         |          |               |            |         |         |               |
| Varela Barca L, Fernandez-Felix BM et al. <sup>14</sup>                                                                                                                                                       | APORTEI                     | Validation only            | -                                                                                                                                                                                                                                                                                                                                                                       | +          | +       | +        | ?             | +          | +       | -       | +             |
|                                                                                                                                                                                                               |                             |                            | Surgical patients only, 342 patients with the outcome (>100 as per guidelines for a validation study); No information RE handling of missing data                                                                                                                                                                                                                       |            |         |          |               |            |         |         |               |
| Gatti G, Perrotti A et al. <sup>3</sup>                                                                                                                                                                       | AEPEI I & II                | Development only           | -                                                                                                                                                                                                                                                                                                                                                                       | +          | +       | -        | ?             | +          | +       | -       | +             |
|                                                                                                                                                                                                               |                             |                            | Surgical patients only. <20 EPV for development cohort (56 in-hospital death); No information RE handling of missing data                                                                                                                                                                                                                                               |            |         |          |               |            |         |         |               |
| Costa MAC, Wollman DR et al. <sup>15</sup>                                                                                                                                                                    | COSTA                       | Development only           | +                                                                                                                                                                                                                                                                                                                                                                       | +          | +       | -        | +             | +          | +       | -       | +             |
|                                                                                                                                                                                                               |                             |                            | <20 EPV for development cohort (49 in-hospital death); No information RE handling of missing data                                                                                                                                                                                                                                                                       |            |         |          |               |            |         |         |               |
| Chee OZ, Tan YQB et al. <sup>16</sup>                                                                                                                                                                         | SHARPEN                     | Development only           | +                                                                                                                                                                                                                                                                                                                                                                       | +          | +       | -        | +             | +          | +       | -       | +             |
|                                                                                                                                                                                                               |                             |                            | <20 EPV for development cohort (54 in-hospital death); No information RE handling of missing data                                                                                                                                                                                                                                                                       |            |         |          |               |            |         |         |               |
| Park LP, Chu VH et al. <sup>17</sup>                                                                                                                                                                          | Simplified Risk Score (ICE) | Development and validation | +                                                                                                                                                                                                                                                                                                                                                                       | +          | +       | ?        | +             | ?          | +       | +       | +             |
|                                                                                                                                                                                                               |                             |                            | Prosthetic valves excluded; selection of predictors made a priori by an experienced cardiologist                                                                                                                                                                                                                                                                        |            |         |          |               |            |         |         |               |
| Lopez J, Fernandez-Hidalgo N et al. <sup>18</sup>                                                                                                                                                             | LOPEZ                       | Development and validation | -                                                                                                                                                                                                                                                                                                                                                                       | ?          | +       | +        | ?             | +          | ?       | -       | ?             |
|                                                                                                                                                                                                               |                             |                            | Surgical patients with left-sided active IE only; Duke criteria used up to 2002 and modified Duke criteria thereafter; Sufficient EPVs for the development study; 132 and 122 patients with the outcome for internal and external validation respectively (>100 as per guidelines for a validation study). Outcome included in-hospital mortality AND/OR urgent surgery |            |         |          |               |            |         |         |               |
| He PC, Wei XB et al. <sup>19</sup>                                                                                                                                                                            | Modified MELD-XI            | Development only           | +                                                                                                                                                                                                                                                                                                                                                                       | +          | +       | -        | +             | +          | +       | -       | +             |
|                                                                                                                                                                                                               |                             |                            | <20 EPV for development cohort (70 in-hospital death)                                                                                                                                                                                                                                                                                                                   |            |         |          |               |            |         |         |               |
| Bjurman C, Snygg-Martin U et al.                                                                                                                                                                              | CystatinC                   | Development only           | +                                                                                                                                                                                                                                                                                                                                                                       | -          | +       | -        | +             | -          | ?       | -       | +             |
|                                                                                                                                                                                                               |                             |                            | Grade of myocardial infarction as predictor not clearly defined, <20 EPV for development cohort (42 death at 5 years)                                                                                                                                                                                                                                                   |            |         |          |               |            |         |         |               |
| EPV: Events per variable; + indicates low ROB/low concern regarding applicability; - indicates high ROB/high concern regarding applicability; ? indicates unclear ROB/unclear concern regarding applicability |                             |                            |                                                                                                                                                                                                                                                                                                                                                                         |            |         |          |               |            |         |         |               |
